# Supplementary material
Source: PubMed Central journal article supplement (PMC4130220)
Supplement: NIHMS592789-supplement-1.pdf [file NIHMS592789-supplement-1.pdf]

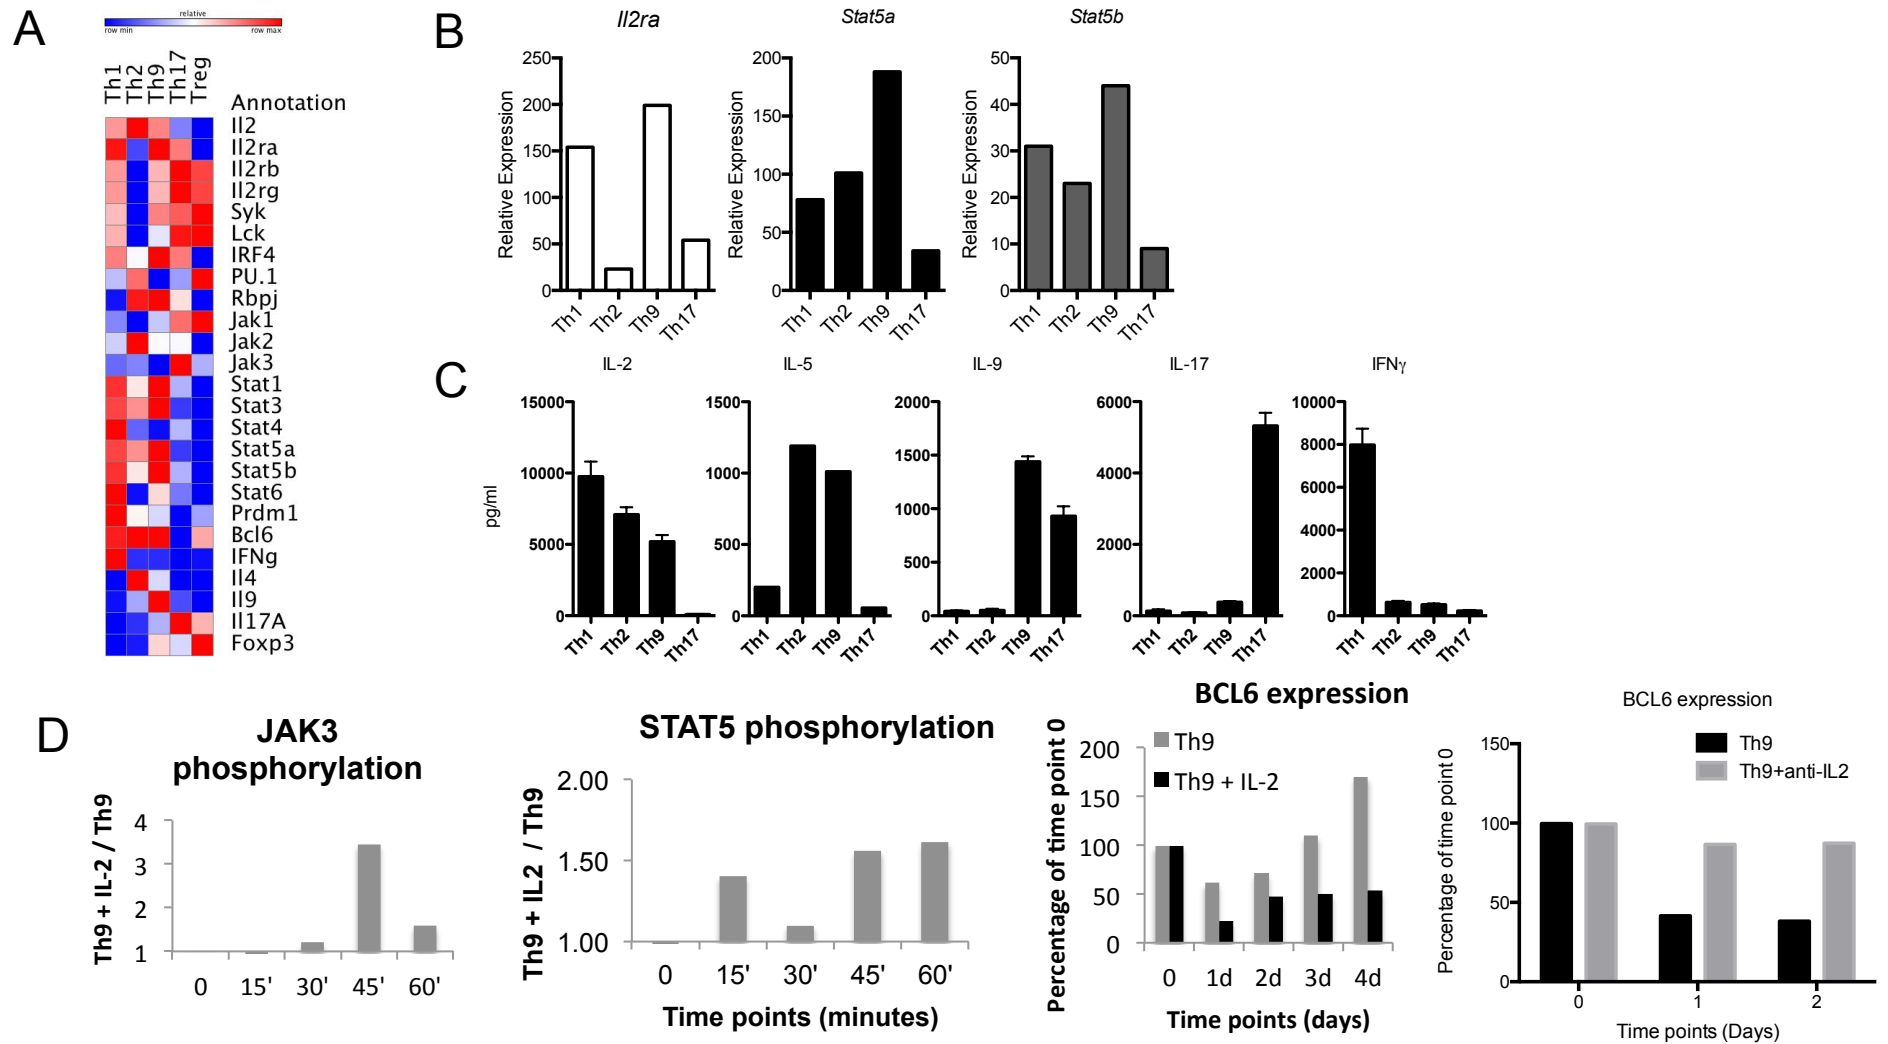

**Supplementary Figure 1.** (A) Heatmap of gene expression downstream of IL-2 signaling in T helper and inducible regulatory CD4<sup>+</sup> cells. Naive CD4<sup>+</sup> T cells from WT mice were differentiated into Th1, Th2, Th9, Th17 and inducible Tregs according to standard protocols and gene expression was measured by RNA-Seq. (B) *Il2ra*, *Stat5a* and *Stat5b* mRNA expression in T cell subsets. Naive CD4<sup>+</sup> T cells from WT mice were differentiated into Th1, Th2, Th9 and Th17 cells according to standard protocols and gene expression was measured by Taqman quantitative PCR on day 4 after differentiation. (C) IL-2 production in T helper cells. Naive CD4<sup>+</sup> T cells were differentiated into T helper cells according to the protocol described in the methods section and IL-2 production was measured on day 4 after differentiation by bead-based Luminex technology. IFN $\gamma$ , IL-5, IL-9, and IL-17 production are shown as controls for Th1, Th2, Th9 and Th17 cell polarization, respectively. (D) Quantification of phospho-JAK3, phospho-STAT5 and BCL6 expression by densitometry (optical density, OD) of the corresponding X-ray films. Ratio of protein expression in IL-2-treated or untreated Th9 cells is shown.

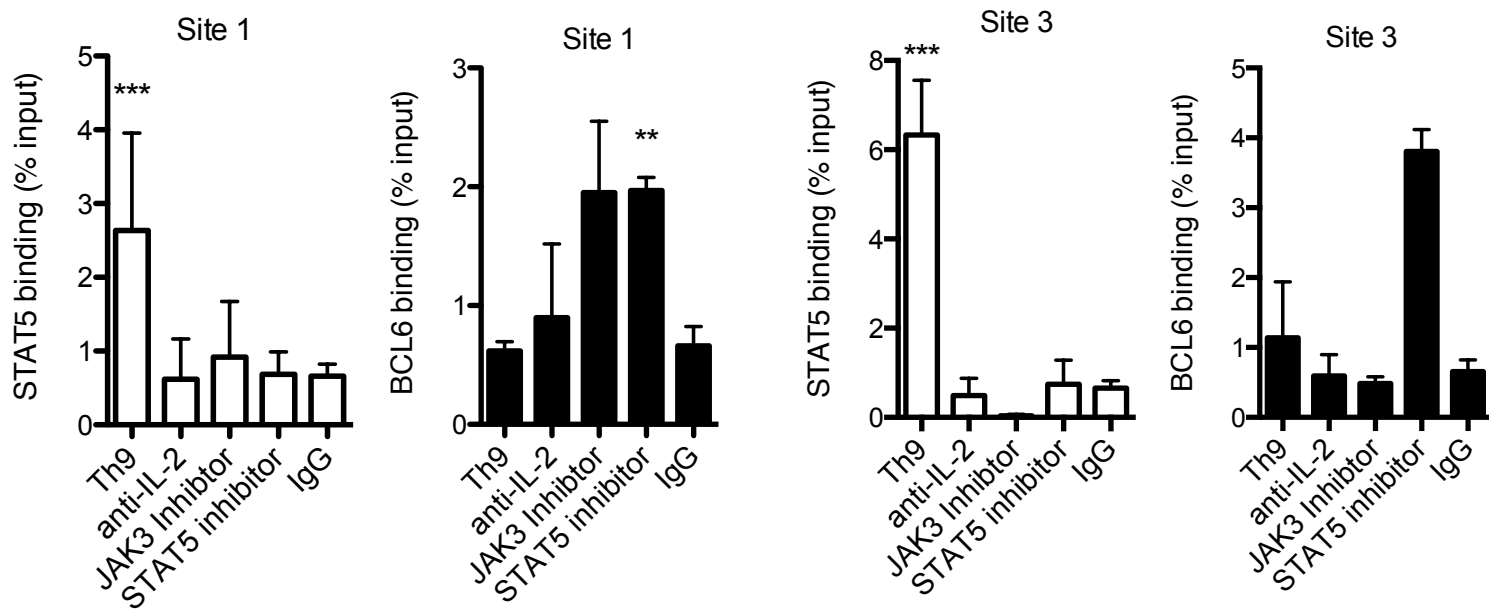

**Supplementary Figure 2.** Binding of STAT5 and BCL6 at two sites (1 and 3) in the *Il9* promoter. Naïve CD4<sup>+</sup> T cells from WT mice were polarized under Th9 cell conditions for 2 days in the presence of anti-IL-2 neutralizing antibody, JAK3 or STAT5 inhibitor. ChIP-Sybr Green PCR was performed to determine STAT5 and BCL6 binding to the *Il9* promoter. \*\* $p < 0.005$ ; \*\*\* $p < 0.0001$  by Student *t* test.

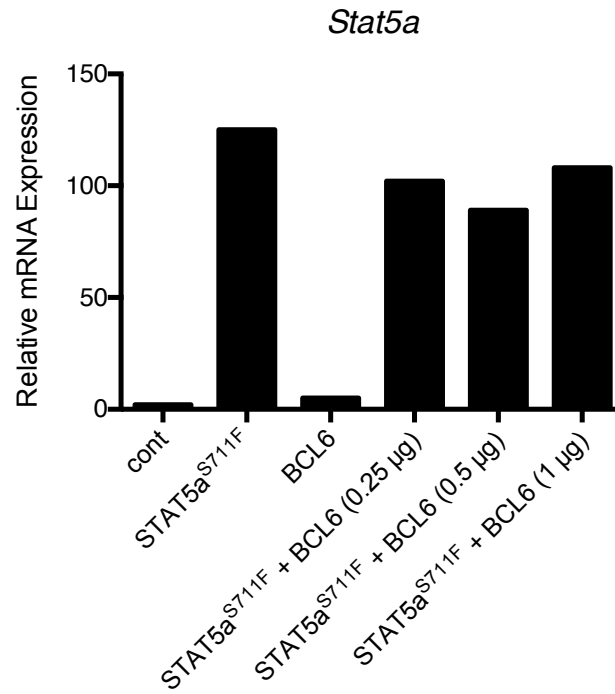

**Supplementary Figure 3.** A representative experiment of *Stat5a* gene expression in 293T cells. HEK 293T cells were transfected with mutant STAT5a/S711F, BCL6 or combination of STAT5a/S711F and increasing doses of Bcl6 together with a constant amount of Il9-Luciferase construct. Cells were lysed 24 hrs after transfection and Stat5a gene expression was assessed by Taqman PCR.
